# Supplementary material for: Lactate Dehydrogenase Superfamily in Rice and Arabidopsis: Understanding the Molecular Evolution and Structural Diversity
Source: MDPI journal article supplement (doi:10.3390/ijms24065900), 2023-03-21
Supplement: s1 [file s1]

**Table S1. List of identified cis elements in the promoter region of rice Ldh genes.**

| <b>Motifs</b>      | <b>Functions</b>                                        |
|--------------------|---------------------------------------------------------|
| CAT-box            | Growth and development                                  |
| AC-II              | Growth and development                                  |
| CARE               | GA induced expression of hydrolase genes in germination |
| O2-site            | Growth and development                                  |
| GCN4_motif         | Growth and development                                  |
| CCGTCC motif       | Growth and development                                  |
| RY-element         | Growth and development                                  |
| AC-I               | Growth and development                                  |
| HD-Zip 1           | Regulate plant growth adaptation responses              |
| G-Box              | Light responsive                                        |
| AE-box             | Light responsive                                        |
| GT1-motif          | Light responsive                                        |
| TCCC-motif         | Light responsive                                        |
| chs-CMA2a          | Light responsive                                        |
| Box4               | Light responsive                                        |
| A-box              | Elicitor, Light responsive                              |
| ACE                | Light responsive                                        |
| Sp1                | Light responsive                                        |
| GC-motif           | Light responsive                                        |
| GATA-motif         | Light responsive                                        |
| TCT-motif          | Light responsive                                        |
| ATC-motif          | Light responsive                                        |
| Gap-box            | Light responsive                                        |
| 3-AF1 binding site | Light responsive                                        |
| I-box              | Light responsive                                        |
| GA-motif           | Light responsive                                        |
| as-1               | biotic stress response                                  |
| ABRE               | ABA regulated gene expression                           |
| MYC                | Jasmonic acid responsive element                        |
| LTR                | Low temperature responsive                              |
| MBS                | Stress responsive                                       |
| ABRE4              | ABA regulated gene expression                           |
| ABRE3a             | ABA regulated gene expression                           |
| DRE Core           | Stress responsive (cold and dehydration)                |
| TGACG-motif        | Me-JA responsive element, SA responsive element         |
| WRE3               | Wound responsive                                        |
| CGTA-motif         | Stress responsive                                       |
| STRE               | Defence and stress related                              |
| ERE                | Stress responsive                                       |
| P-box              | Stress responsive                                       |
| TC-rich element    | Stress responsive                                       |
| ARE                | Stress responsive                                       |
| TCA-element        | Stress responsive                                       |
| AuxRR-core         | Stress responsive                                       |
| A-box              | Elicitor, Light responsive                              |
| W-box              | Fungal elicitor, wound responsive                       |

|            |                   |
|------------|-------------------|
| CCGTCC-box | Same as A-box     |
| Wyn-motif  | Stress responsive |

**Table S2.** List of primers used for the qRT-PCR study.

| Primer    | Sequence                 |
|-----------|--------------------------|
| OsLdh1_F  | AGGCCATTTTGCAGACTAGC     |
| OsLdh1_R  | AAGCTCAAATCCTCGGTATCCC   |
| OsLdh2_F  | GAAGGCGGAATTTTCGTGTC     |
| OsLdh2_R  | AGGCACAAGGGTCAAATAGC     |
| OsLdh3_F  | TTATCATCGTCGTCGTCGTCTC   |
| OsLdh3_R  | CATACTACAGTCGAGTCGATCAC  |
| OsLdh4_F  | CGACCGTGAAATGCTAATTACCC  |
| OsLdh4_R  | GCATGCAAAATTGTTCAACAACAG |
| OsLdh5_F  | ATCGTTGCAAGGGTTTCGTC     |
| OsLdh5_R  | TCATGAGATGCACCGTGATAGC   |
| OsLdh6_F  | CGAGATGTTGTGCTCCAGAA     |
| OsLdh6_R  | GGGTCATGATTTGGGTTTAC     |
| OsLdh7_F  | CGCCAACCCGTTTATATATGCC   |
| OsLdh7_R  | GCGGCCATGAAATTAAGCTTCG   |
| OsLdh8_F  | TGCAGTGGTGCTCCATTAGT     |
| OsLdh8_R  | GGCAATCCAGTCAGCATTTT     |
| OsLdh9_F  | TGCATTGTATTGCCATTGCT     |
| OsLdh9_R  | TTGTCCAGCTACAAACCAACC    |
| OsLdh10_F | TTGCCATAGATGCACATGCC     |
| OsLdh10_R | TGGCTGCAACACAATAACCG     |
| OsLdh11_F | TAAACAGCCTCAGCCCTTGT     |
| OsLdh11_R | AGTACTGCGTGGTGGCTTCT     |
| OsLdh12_F | TCTTGGAATGCCCAATTTA      |
| OsLdh12_R | TCAGAGCAGGGTTCCTTTT      |

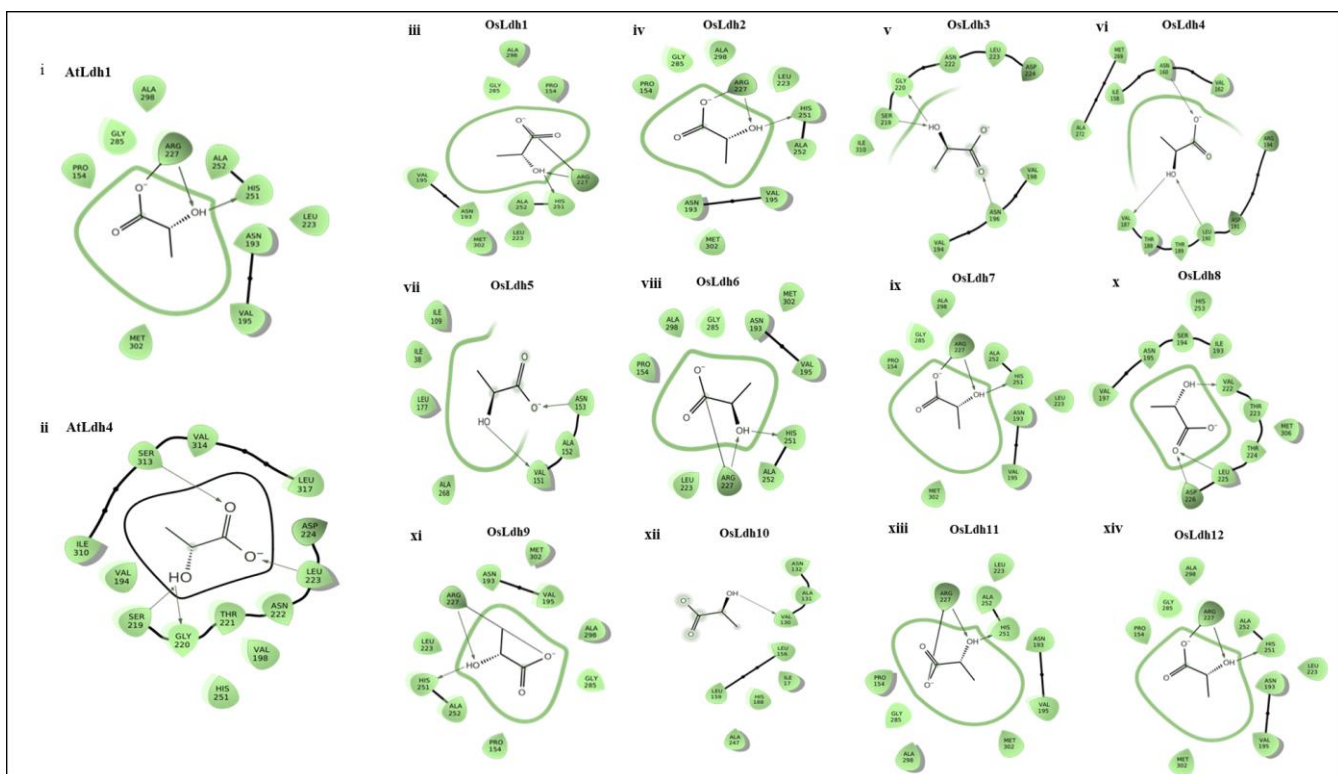

**Figure S1.** The 2D plot of AtLdh-L-lactate and OsLdh-L-lactate complexes: (i) AtLdh1, (ii) AtLdh4, (iii) OsLdh1, (iv) OsLdh2, (v) OsLdh3, (vi) OsLdh4, (vii) OsLdh5, (viii) OsLdh6, (ix) OsLdh7, (x) OsLdh8, (xi) OsLdh9, (xii) OsLdh10, (xiii) OsLdh11, (xiv) OsLdh12 shows the 2D sketcher plot of the active site geometry of the respective proteins when docked with **ligand L-lactate**. The molecular docking is carried out by the Glide ligand docking module of the Schrodinger Suite. The images have been retrieved from the ligand preparation and library design module of the Schrodinger Suite.

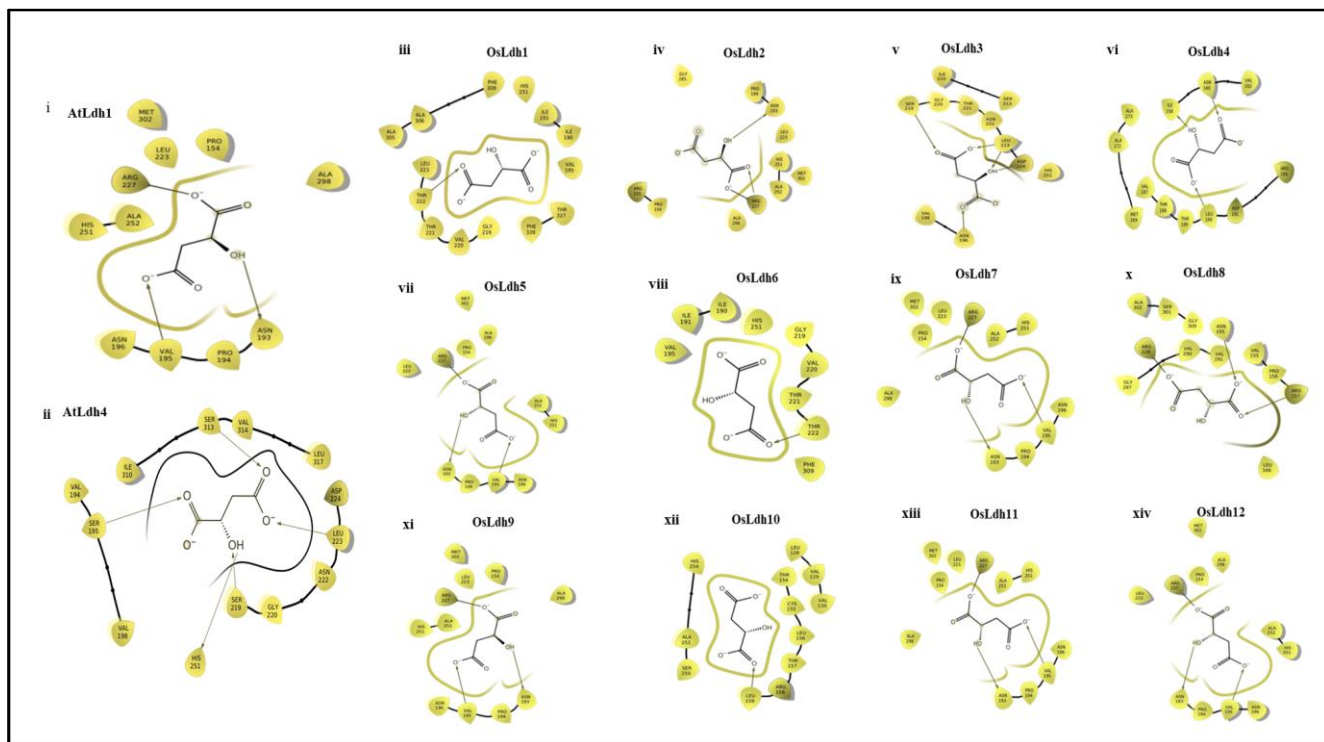

**Figure S2.** The 2D plot of AtLdh-L-lactate and OsLdh-L-lactate complexes: (i) AtLdh1, (ii) AtLdh4, (iii) OsLdh1, (iv) OsLdh2, (v) OsLdh3, (vi) OsLdh4, (vii) OsLdh5, (viii) OsLdh6, (ix) OsLdh7, (x) OsLdh8, (xi) OsLdh9, (xii) OsLdh10, (xiii) OsLdh11, (xiv) OsLdh12 shows the 2D sketcher plot of the active site geometry of the respective proteins when docked with **ligand malate**. The molecular docking is carried out by the Glide ligand docking module of the Schrodinger Suite. The images have been retrieved from the ligand preparation and library design module of the Schrodinger Suite.
